# Supplementary material
Source: Springer Nature journal article supplement (https://www.springermedizin.de/resource/supplementary/12874_2005_123_MOESM4_ESM.pdf/9433820)

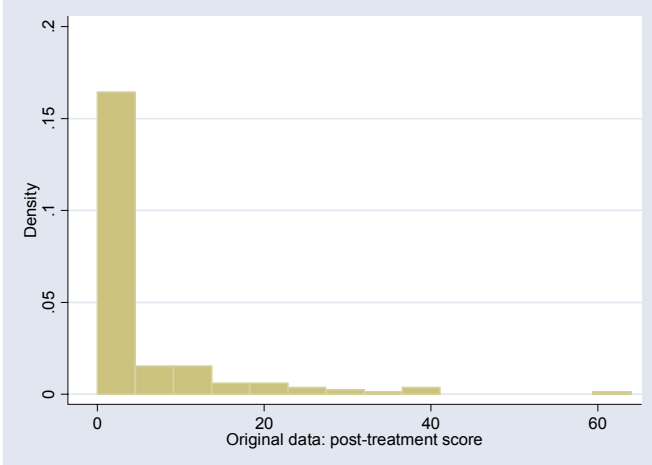

4a

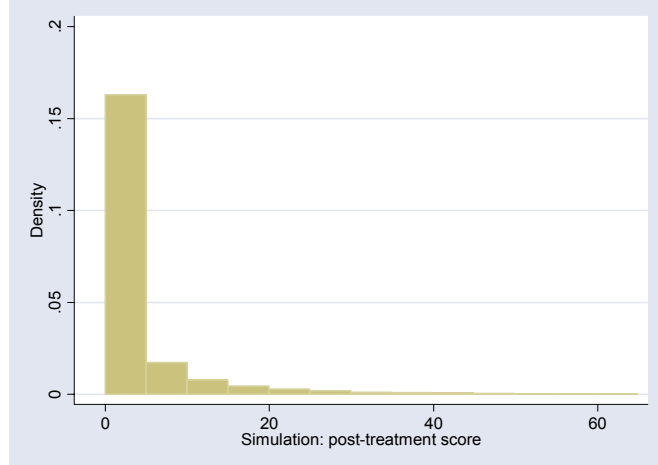

4b

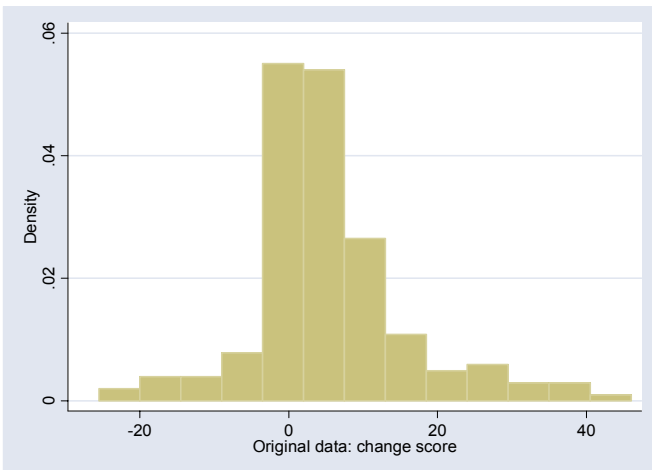

4c

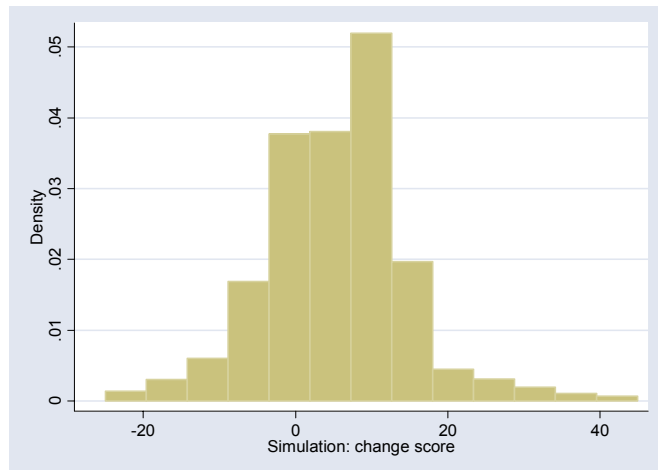

4d

Supplement: MOESM4 [file 9433820]
